# Supplementary material for: Impact of vitamin D and vitamin D receptor TaqI polymorphism in primary human myoblasts
Source: PubMed Central journal article supplement — Endocr Connect. 2019 Jun 27;8(7):1070–81. doi: 10.1530/EC-19-0194 (PMC6652245; doi:10.1530/ec-19-0194), 2019-06-27
Supplement: supplementary_figure_2.pdf [file supplementary_figure_2.pdf]

**A.**

DAPI

× 100

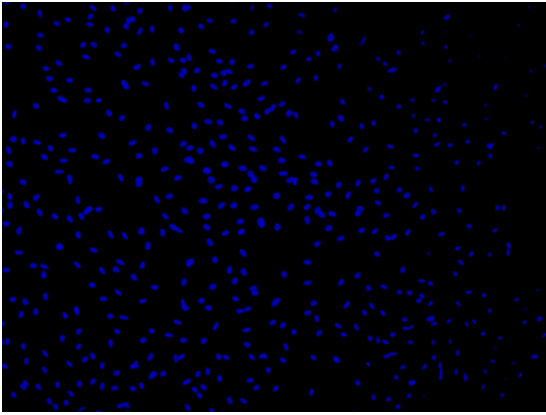

**B.**

× 200

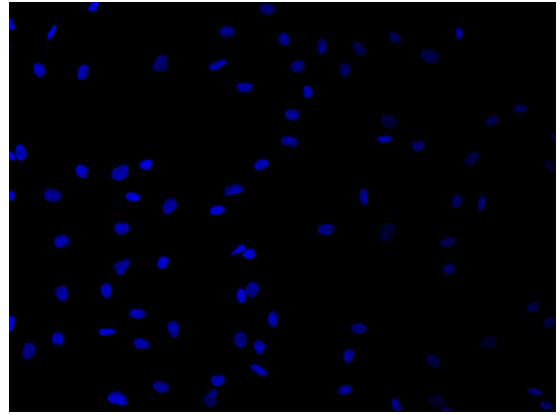

Desmin+

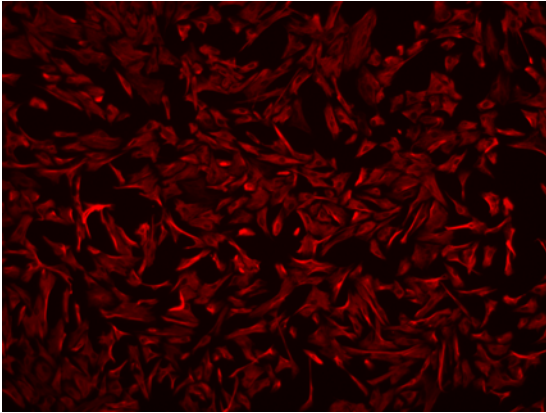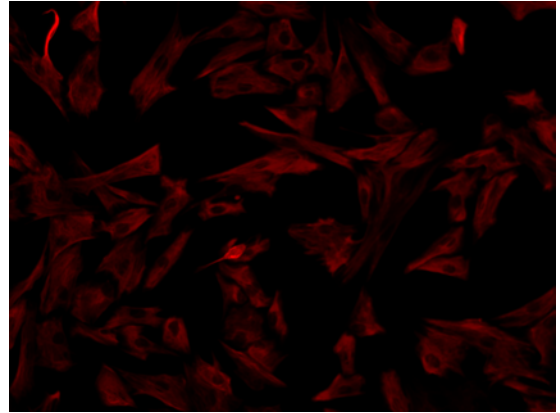

DAPI / Desmin+

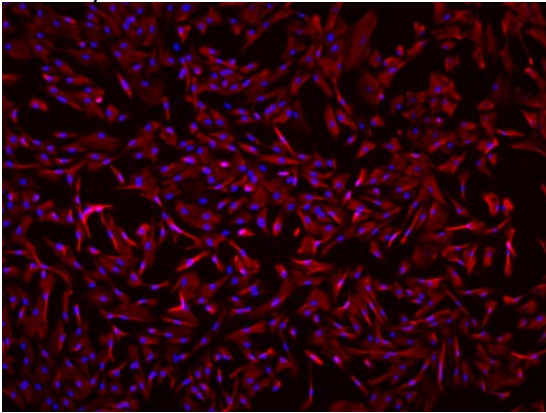

CD56+

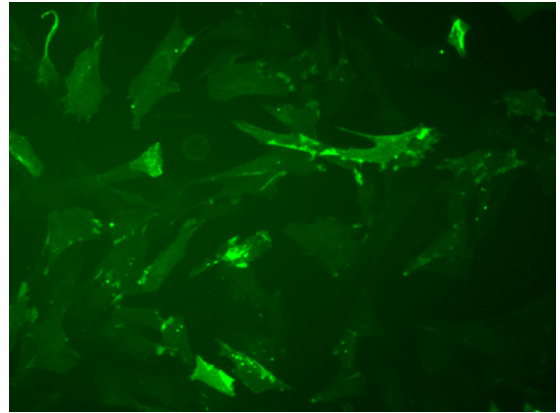

DAPI/Desmin+/CD56+

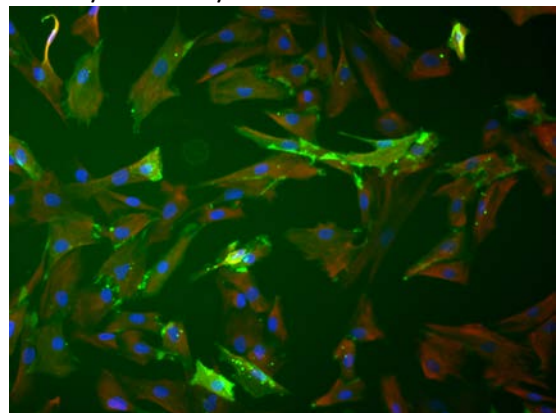

C.

Fibroblasts TE7+

X 200

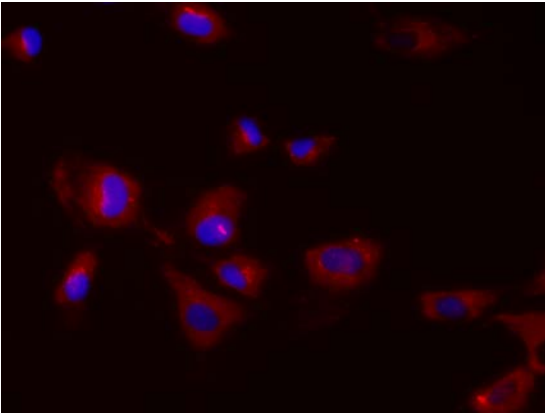

Characterisation of sorted human myoblast cells using Desmin, CD56 and TE7 antibodies. Following MACS, yields (A) desmin + and (B) desmin/CD56+ myogenic cells that are (C) negative for fibroblast marker TE7.
