# Supplementary figures and images for: Impact of vitamin D and vitamin D receptor TaqI polymorphism in primary human myoblasts
Source: PubMed Central journal article supplement — Endocr Connect. 2019 Jun 27;8(7):1070–81. doi: 10.1530/EC-19-0194 (PMC6652245; doi:10.1530/ec-19-0194), 2019-06-27

# VDR

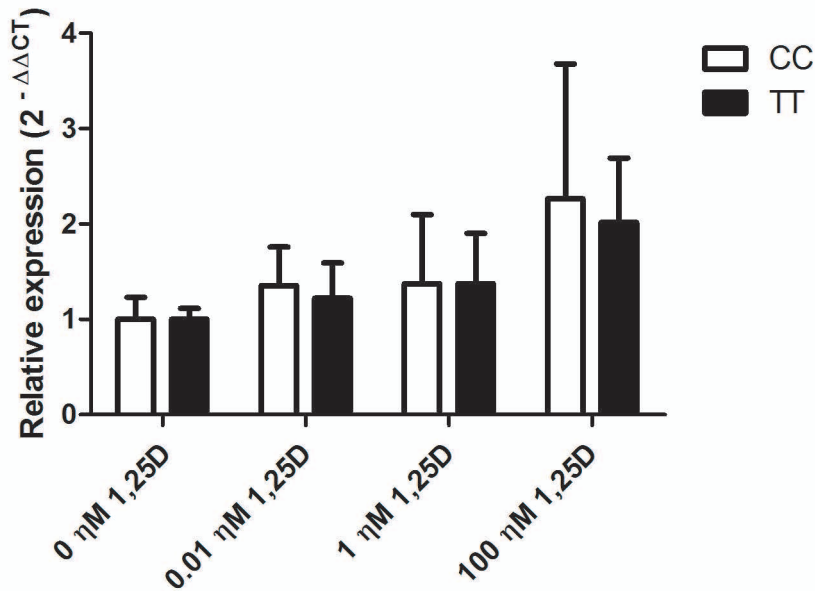

Supplement: supplementary_figure_1a.pdf [file supplementary_figure_1a.pdf]

# CYP24A1

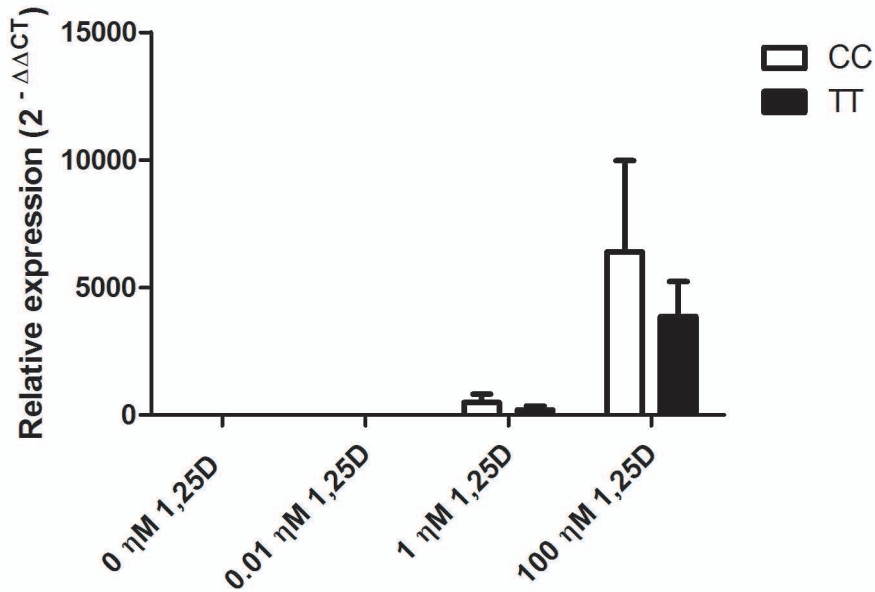

Supplement: supplementary_figure_1b.pdf [file supplementary_figure_1b.pdf]
